# Supplementary material for: Modification of hygroscopicity and tabletability of l-carnitine by a cocrystallization technique
Source: Royal Society of Chemistry journal article supplement (doi:10.1039/d0ce01820a), 2021-01-01
Supplement: d0ce01820a1.pdf [file d0ce01820a1.pdf]

## Supplementary Information

### 1 **Modification of hygroscopicity and tableability of L-carnitine by cocrystallization** 2 **technique**

3 Zunting Pang<sup>a,#</sup>, Xingye Weng<sup>b,#</sup>, Yuanfeng Wei<sup>a</sup>, Yuan Gao<sup>a</sup>, Jianjun Zhang<sup>b,\*</sup>, Shuai Qian<sup>a,\*</sup>

4 <sup>a</sup> School of Traditional Chinese Pharmacy, China Pharmaceutical University, Nanjing, 211198,  
5 P.R., China

6 <sup>b</sup> School of Pharmacy, China Pharmaceutical University, Nanjing, 211198, P.R., China

7

8

---

9 Zunting Pang and Xingye Weng contributed equally to this works

10 Corresponding authors and address for reprint:

11 Corresponding authors:

12 Dr. Jianjun Zhang

13 Tel.: +86 25 83379418; Fax: +86 25 83379418;

14 E-mail: [amicute@163.com](mailto:amicute@163.com)

15 Dr. Shuai Qian

16 Tel.: +86 139 1595 7175

17 E-mail: [silence\\_qs@163.com](mailto:silence_qs@163.com)

18 **1. Tableability test**

19 **Table S1** Tablet thickness (mm, n=3, mean ± SD), diameter (mm) and shape of MYR, LC salts  
 20 and LC-MYR cocrystal obtained under different pressure.

| Sample           | Pressure (Mpa)                                                                                     |                                                                                                    |                                                                                                    |                                                                                                     |                                                                                                      |                                                                                                     |
|------------------|----------------------------------------------------------------------------------------------------|----------------------------------------------------------------------------------------------------|----------------------------------------------------------------------------------------------------|-----------------------------------------------------------------------------------------------------|------------------------------------------------------------------------------------------------------|-----------------------------------------------------------------------------------------------------|
|                  | 50                                                                                                 | 75                                                                                                 | 100                                                                                                | 125                                                                                                 | 150                                                                                                  | 175                                                                                                 |
| MYR              | <br>1.426±0.013   | <br>1.379±0.024   | <br>1.334±0.008   | <br>1.291±0.012   | <br>1.274±0.002   | <br>1.236±0.005  |
| LC fumarate      | <br>1.593±0.015   | <br>56±0.01       | <br>1.523±0.012   | <br>1.483±0.025   | <br>1.43±0.026    | <br>1.417±0.006  |
| LC tartrate      | <br>1.623±0.006  | <br>1.61±0.04    | <br>1.573±0.023  | <br>1.553±0.035  | <br>1.513±0.045  | <br>1.543±0.015 |
| LC-MYR cocrystal | <br>1.773±0.029 | <br>1.677±0.006 | <br>1.631±0.012 | <br>1.601±0.021 | <br>1.583±0.016 | <br>562±0.011  |

21

22 **Table S2** Powder true density of MYR, LC fumarate, LC tartrate and LC-MYR cocrystal (n=3,  
 23  $\bar{X} \pm SD$ )

| Sample           | Powder true density (g/cm <sup>3</sup> )                    |
|------------------|-------------------------------------------------------------|
| MYR              | 1.4946±0.0045                                               |
| LC fumarate      | 1.3198±0.0051                                               |
| LC tartrate      | 1.359±0.0048                                                |
| LC-MYR cocrystal | 1.7897±0.0076                                               |
|                  | (Calculated value from simulated crystal structure: 1.7975) |

24

## Supplementary Information

25 The higher true density of LC-MYC cocystal can be interpreted based on its different crystal  
26 structure with LC. As shown in Fig. S1A, LC exhibited an obvious active slip system view  
27 along  $b$  axis (green line) while the slip system was absent in LC-MYR cocystal and it had  
28 closer intermolecular distance due to the multiple 3D hydrogen bonding network (Fig. S1B).  
29 Slip planes are crystallographic planes that have the weakest inter-planar interactions in a given  
30 crystal, and are associated with the higher molecular density and the larger separation between  
31 adjacent planes<sup>1, 2</sup>. Thus, absence of slip planes in LC-MYR cocystal offered a closer crystal  
32 packing, which conferred a dense crystalline structure and a higher density.

33

34 **Fig. S1** Crystal packing patterns of (A) LC and (B) LC-MYR cocystal viewed along the  $b$  axis

35

A

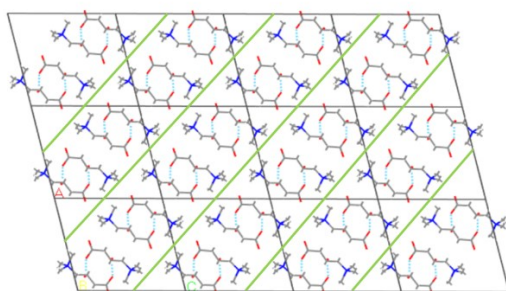

B

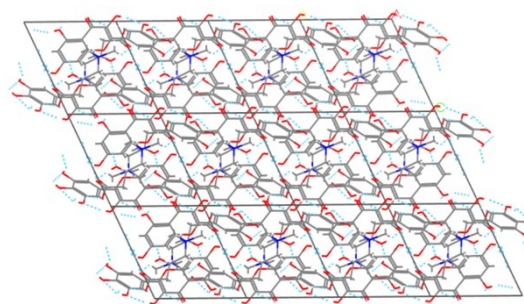

36

37

39 **2. Thermal analysis**

40 **Fig. S2** Water molecules in one crystal cell of MYR monohydrate (Downloaded from the  
41 Cambridge Crystallographic Database, Deposition Number: 1409763)

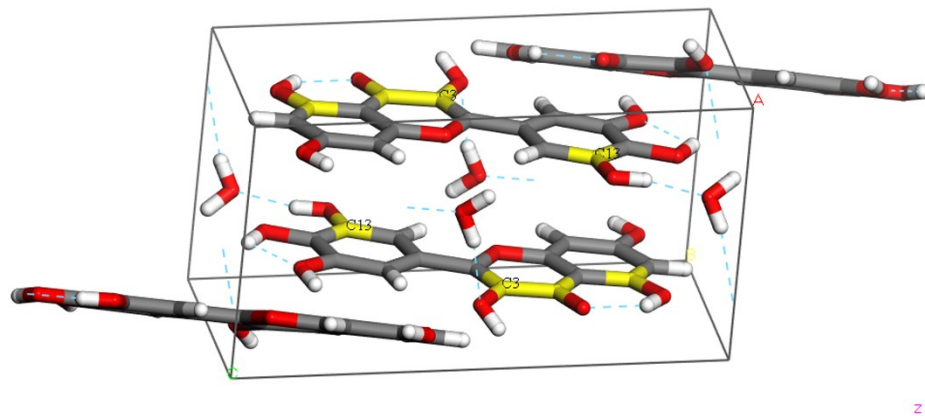

42

43

| D-H...A                            | D...A/ Å | H...A/ Å | D-H...A/ ° |
|------------------------------------|----------|----------|------------|
| O-H(H <sub>2</sub> O) ... O3(MYR)  | 2.969    | 2.196    | 153.496    |
| O13-H(MYR) ... O(H <sub>2</sub> O) | 2.665    | 1.890    | 152.764    |

44

45

46 **3. Cocrystal structure simulation**

47 **Fig. S3** The measured powder X-ray diffraction patterns (blue), Rietveld refinements (red) and  
 48 underneath the difference curves (black) of LC-MYR cocrystal. The green tick marks indicated  
 49 reflection positions.

Powder Refinement:  $R_{wp} = 14.72\%$   $R_{wp}(w/o\ bck) = 25.69\%$   $R_p = 10.34\%$

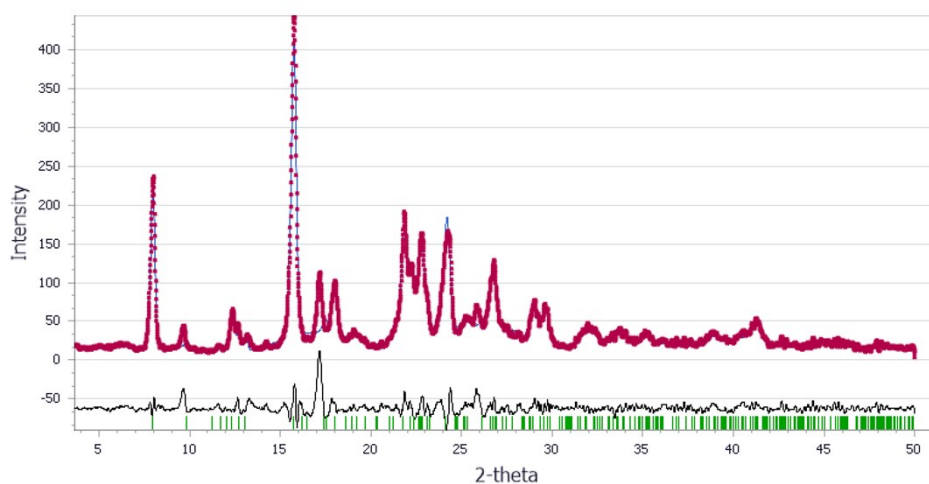

50

51 **Fig. S4** Simulated LC-MYR cocrystal structure.

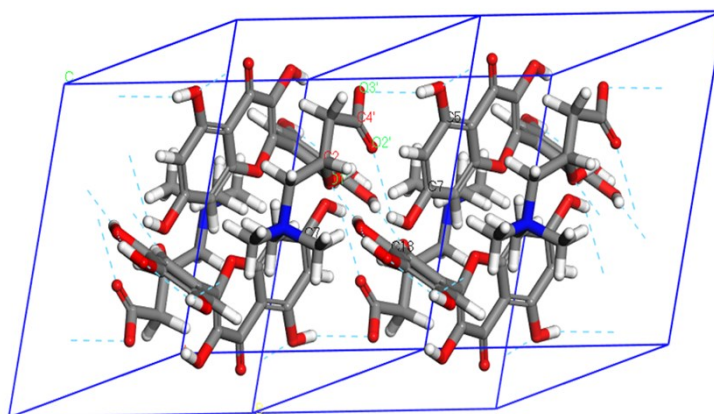

52

53

54 **Table. S3** Crystallographic data of simulated LC-MYR cocrystal

| Item                     | LC-MYR cocrystal                          |
|--------------------------|-------------------------------------------|
| Formula                  | $(C_{15}H_{10}O_8) \cdot (C_7H_{15}NO_3)$ |
| Space group              | $P\bar{1}$                                |
| Crystal system           | Triclinic                                 |
| a(Å)                     | 12.0089                                   |
| b(Å)                     | 8.7926                                    |
| c(Å)                     | 14.0875                                   |
| $\alpha$ (°)             | 83.976                                    |
| $\beta$ (°)              | 42.351                                    |
| $\gamma$ (°)             | 62.990                                    |
| Volume (Å <sup>3</sup> ) | 824.22                                    |
| R <sub>wp</sub> %        | 14.72 %                                   |

55

56 **Table. S4** Hydrogen bond parameters for LC-MYR cocrystals

| D-H...A                | D...A/ Å | H...A/ Å | D-H...A/ ° |
|------------------------|----------|----------|------------|
| O5-H(MYR) ... O3'(LC)  | 2.918    | 2.448    | 110.677    |
| O7-H(MYR) ... O2'(LC)  | 2.794    | 2.367    | 107.650    |
| O13-H(MYR) ... O1'(LC) | 2.746    | 1.974    | 141.083    |

57

58 4. FTIR analysis

59 Fig. S5 FT-IR spectra of LC-MYR cocrystal and LC tartrate

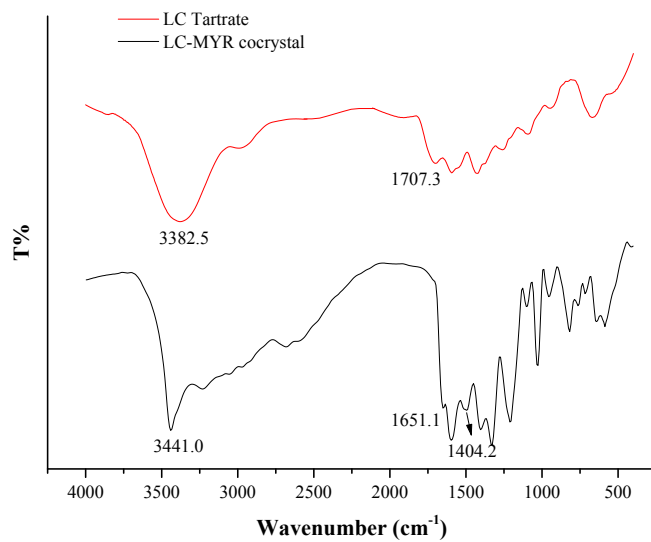

60  
61

62 **5. <sup>13</sup>C ss NMR Analysis**

63 **Table S5** Experimental <sup>13</sup>C CP/MAS chemical shifts in the MYR and LC spectra compared  
 64 with the previous researches.

| Molecules     | C atoms | <sup>13</sup> C Chemical Shifts/ppm |                           |
|---------------|---------|-------------------------------------|---------------------------|
|               |         | Experimental: This work             | Literature <sup>3,4</sup> |
| MYR           | C2      | 145.60                              | 145.6                     |
|               | C3      | 135.66                              | 135.8                     |
|               | C4      | 172.22                              | 172.4                     |
|               | C5      | 156.18                              | 156.3                     |
|               | C6      | 98.75                               | 99.1                      |
|               | C7      | 164.49                              | 164.7                     |
|               | C8      | 95.26                               | 95.5                      |
|               | C9      | 156.18                              | 156.3                     |
|               | C10     | 100.80                              | 101.1                     |
|               | C11     | 119.96                              | 120.4                     |
|               | C12     | 109.69                              | 109                       |
|               | C13     | 142.26                              | 142.3                     |
|               | C14     | 133.06                              | 133.3                     |
|               | C15     | 142.26                              | 142.3                     |
|               | C16     | 107.01                              | 108.5                     |
|               | LC      | C1'                                 | 69.67                     |
| C2'           |         | 65.60                               | 64.9                      |
| C3'           |         | 47.06                               | 43.8                      |
| C4'           |         | 175.41                              | 178.9                     |
| C5', C6', C7' |         | 51.32                               | 54.9                      |

65 The reported <sup>13</sup>C NMR of LC was obtained through liquid state NMR in D<sub>2</sub>O.

66



### 67 **6. Intrinsic dissolution testing**

#### 68 **Methods**

69 An improved method for IDR measurement was employed to perform the intrinsic  
70 dissolution rate (IDR) studies <sup>5</sup>. Briefly, 250 mg of MYR and LC-MYR cocrystal was  
71 compressed at a pressure of 75 MPa for 10 sec using a hydraulic press (4350L, Carver<sup>®</sup>,  
72 Wabash, USA). The resulting discs with a surface area of 1.3273 cm<sup>2</sup> were inserted into a  
73 molten beeswax-mold, in such a way that only one face could be in contact with dissolution  
74 medium. Because of the strong hygroscopicity of LC, PM could not be compressed to tablets at  
75 room temperature with 30% RH humidity condition. Therefore, the IDR of MYR in LC  
76 solution was performed with the method of dropping MYR tablets into the medium with  
77 dissolved specific amount of LC to assess the effect of physical mixed LC on MYR dissolution  
78 rate.

79 A USP II dissolution apparatus was applied in the intrinsic dissolution study. Dissolution  
80 tests (three replicates) were performed in 600 mL of pH 4.5 phosphate buffer saline (PBS 4.5)  
81 at 37 °C with the paddle rotating speed of 50 rpm. Three milliliters of aliquots were withdrawn  
82 at predetermined time points (5, 10, 20, 30, 45, 60, 90, 120, 150, 180, 210 and 240 min) and  
83 analyzed by the HPLC/UV method in “Stoichiometry determination of cocrystal” section. To  
84 evaluate the IDR of MYR, the cumulative amount dissolved per surface unit of the tablets was  
85 plotted against time. The slope of the linear region was taken as the intrinsic dissolution rate <sup>6</sup>.

#### 86 **Result and discussion**

87 As the intrinsic dissolution profiles ([Fig. S6](#)) shows, crystalline MYR, MYR in LC solution  
88 and LC-MYR cocrystal exhibited linear release profiles with IDR values of 0.1599, 0.16591

## Supplementary Information

89 and  $1.36132 \mu\text{g}\cdot\text{cm}^{-2}\cdot\text{min}^{-1}$ , respectively. MYR in medium containing LC exhibited similar  
90 IDR with MYR alone, which meant that LC could not improve the dissolution rate of MYR  
91 and consisted with the results in “Dissolution under non-sink condition” section. LC-MYR  
92 cocrystal showed a significant dissolution rate enhancement (8.5-fold) compared to pure MYR.

93 In addition, LC-MYR cocrystal showed the typical linear dissolution profile in the medium  
94 ( $R^2>0.95$ ), while the first three points (5, 10, 20 min) slightly deviated from the IDR curve and  
95 the dotted line connected by the three points (green one) almost went through origin. During  
96 the dissolution process of the cocrystal, some small fragments fell from the surface of the tablet  
97 owing to the high hydrophilic LC-MYR cocrystal. The deviation might be attributed result  
98 from this phenomenon.

99 **Fig. S6** Intrinsic dissolution profiles of LC-MYR cocrystal, MYR in LC solution and MYR in  
100 PBS 4.5 (n=3)

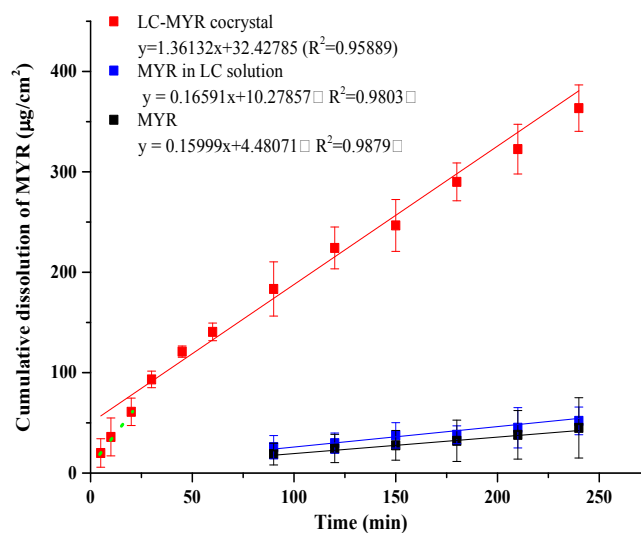

101

102

103 **7. Effect of LC on the solubility of MYR**

104 Excess powder of MYR was added into glass vials containing 3 mL of LC aqueous solution.

105 The molar ratios of MYR to LC were 1:0.25, 1:0.5, 1:0.75, 1:0.9, and 1:1.5, respectively. Then

106 the solutions were magnetically stirred for 24 h at 37 °C. The slurry was filtered through a 0.22

107  $\mu\text{m}$  filter and then analyzed by HPLC/UV analysis. Each experiment was repeated in triplicate.108 **Table S6. Solubilities of MYR in LC aqueous solution with different molar ratios ( $\bar{X} \pm$   
109 **SD mg/mL,  $n=3$ )****

| Molar ratio | 1:0.25          | 1:0.5           | 1:0.75          | 1:0.9           | 1:1.5           |
|-------------|-----------------|-----------------|-----------------|-----------------|-----------------|
| Solubility  | 2.43 $\pm$ 0.03 | 2.36 $\pm$ 0.11 | 2.28 $\pm$ 0.32 | 2.39 $\pm$ 0.06 | 2.34 $\pm$ 0.12 |

110

111

112 **References**113 1. S. Chattoraj, L. Shi and C. C. Sun, *CrystEngComm*, 2010, **12**, 2466.114 2. C. C. Sun and Y. H. Kiang, *Journal of Pharmaceutical Sciences*, 2008, **97**, 3456-3461.115 3. I. Wawer and A. Zielinska, *Magnetic Resonance in Chemistry*, 2001, **39**, 374-380.116 4. H. Kawagishi, H. Murakami, S. Sakai and S. Inoue, *Phytochemistry*, 2006, **67**, 2676-2680.117 5. J. Wood, J. Syarto and H. Letterman, *Journal of Pharmaceutical Sciences*, 1965, **54**, 1068.118 6. J. Zhang, D. Liu, Y. Huang, Y. Gao and S. Qian, *international Journal of Pharmaceutics*, 2012, **436**, 311-317.

119
